# Supplementary material for: Hollow CuSe nanocubes as a bifunctional electrocatalyst for energy-saving overall urea–water electrolysis
Source: Royal Society of Chemistry journal article supplement (doi:10.1039/d4nj02925a), 2024-01-01
Supplement: d4nj02925a1.pdf [file d4nj02925a1.pdf]

## Supporting Information

# Hollow CuSe nanocubes as bifunctional electrocatalyst for energy-saving overall urea-water electrolysis

Shouyi Wang<sup>#, a</sup>, Siyu Liu<sup>#, a</sup>, Ying Yang<sup>\*, a</sup>, Jiayao Jiang<sup>a</sup>, Leijiao Li<sup>\*, a</sup>, Tingting Wang<sup>\*, a, b</sup>

<sup>a</sup> Key Laboratory of Applied Chemistry and Nanotechnology at Universities of Jilin Province, Changchun University of Science and Technology, Changchun 130022, China.

<sup>b</sup> Chongqing Research Institute, Changchun University of Science and Technology, No.5 Yulin Road, Longxing Town, Yubei District, Chongqing City 401135, China.

Email: [yangying0807@126.com](mailto:yangying0807@126.com); [lileijiao@cust.edu.cn](mailto:lileijiao@cust.edu.cn); [Wangtt@cust.edu.cn](mailto:Wangtt@cust.edu.cn)

<sup>#</sup> These authors contributed equally to this work.

## Experimental Section

### Chemicals

Copper sulfate pentahydrate ( $\text{CuSO}_4 \cdot 5\text{H}_2\text{O}$ ) and sodium hydroxide were purchased from Sinopod Group Chemical Reagent Co., LTD. Polyvinylpyrrolidone (PVP), selenium dioxide ( $\text{SeO}_2$ ), ascorbic acid, DL-tartaric acid, D (+) glucose, selenium powder, sodium citrate, copper citrate were purchased from Shanghai Aladdin Biochemical Technology Co., LTD. Urea ( $\text{CH}_4\text{N}_2\text{O}$ ) was from Tianjin Zhiyuan chemical reagent Co., Ltd. Potassium hydroxide (KOH) was purchased from Jindong Tianzheng Fine Chemical Reagent Factory. Pt/C (20 wt.%, Pt on Vulcan XC-72R) and Nafion (5 wt%) were obtained from Aldrich. All reagents are analytically pure and used directly without further purification and all aqueous solutions were prepared with ultrapure water ( $18.2 \text{ M}\Omega \cdot \text{cm}$ ) obtained from a Millipore system.

### Physical Characterizations

The morphology and microstructure were observed by transmission electron microscope (TEM Tecnai G2 F20). The Crystalline phase of the synthesized sample was tested by Y-2000 X-ray diffractometer (XRD) with the  $2\theta$  ranges from  $10^\circ$  to  $80^\circ$  at a scanning rate of  $10^\circ \text{ min}^{-1}$ .

### Electrochemical Measurements

Electrochemical HER performance was tested on an electrochemical workstation (CHI 660e) in 1 M KOH solution at room temperature, using a standard three-electrode system. The synthesized catalyst was selected as the working electrode, Hg/HgO electrode as the reference electrode, and carbon rod as the counter electrode. The

polarization curves were recorded by linear sweep voltammetry (LSV) technique at  $5 \text{ mV}\cdot\text{s}^{-1}$  with iR correction. In addition, the current density is calculated on the basis of the actual electrode area ( $0.5 \times 0.5 \text{ cm}^2$ ) immersed in the electrolyte. All of the measured potentials were showed versus reversible hydrogen electrode (RHE) following the equation:  $E_{\text{RHE}}=E_{\text{Hg/HgO}} + 0.098 \text{ V}+0.059 \text{ pH}$ . According to the reported electrochemical method, the electrochemical active surface area (ECSA) of the catalyst modified electrode was calculated by double-layer capacitor ( $C_{\text{dl}}$ ). The cyclic voltammograms (CVs) were tested with different rates from 20 to  $100 \text{ mV}\cdot\text{s}^{-1}$ . Electrochemical impedance spectroscopy (EIS) was performed at a current density of  $10 \text{ mA}\cdot\text{cm}^{-2}$ . All impedance data have been fitted. For long-term stability tests, which were carried out at  $10 \text{ mV}\cdot\text{s}^{-1}$ . The long-term durability test of CuSe/NF electrode was tested by constant current electrolysis.

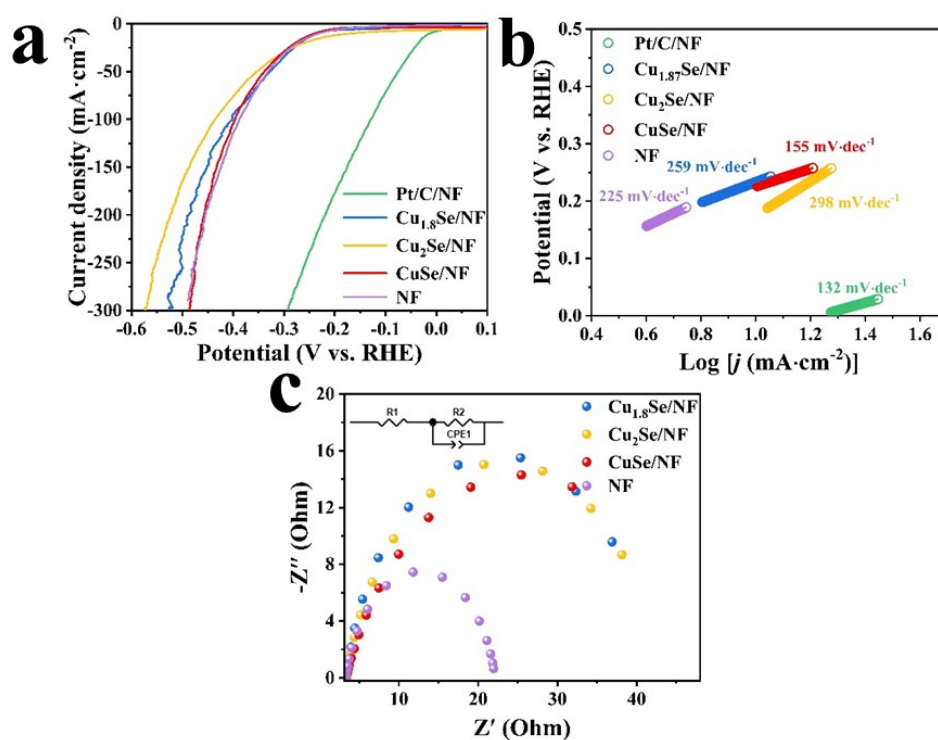

**Fig. S1** (a) LSV curves towards the HER of Pt/C/NF, Cu<sub>1.8</sub>Se/NF, Cu<sub>2</sub>Se /NF, CuSe/NF and NF in 1.0 M KOH; (b) Tafel slopes towards the HER in 1.0 M KOH; (c) EIS curves at  $10 \text{ mA}\cdot\text{cm}^{-2}$  towards the HER in 1.0 M KOH.

Table S1 Comparison of HER properties of CuSe/NF with other catalysts.

| Catalyst                              | $j$ (mA cm <sup>-2</sup> ) | $\eta$ (mV) | Ref.      |
|---------------------------------------|----------------------------|-------------|-----------|
| CuSe/NF                               | 10                         | 199         | This work |
| Zn-MoSe <sub>2</sub>                  | 10                         | 182         | 1         |
| Cu <sub>2</sub> Se@NiFe-LDHNS         | 10                         | 205         | 2         |
| Cu <sub>3</sub> P/Cu <sub>2</sub> Se  | 10                         | 166         | 3         |
| Cu-Ni <sub>3</sub> S <sub>2</sub> /NF | 10                         | 188         | 4         |
| NiCo-WSe <sub>2</sub>                 | 10                         | 205         | 5         |

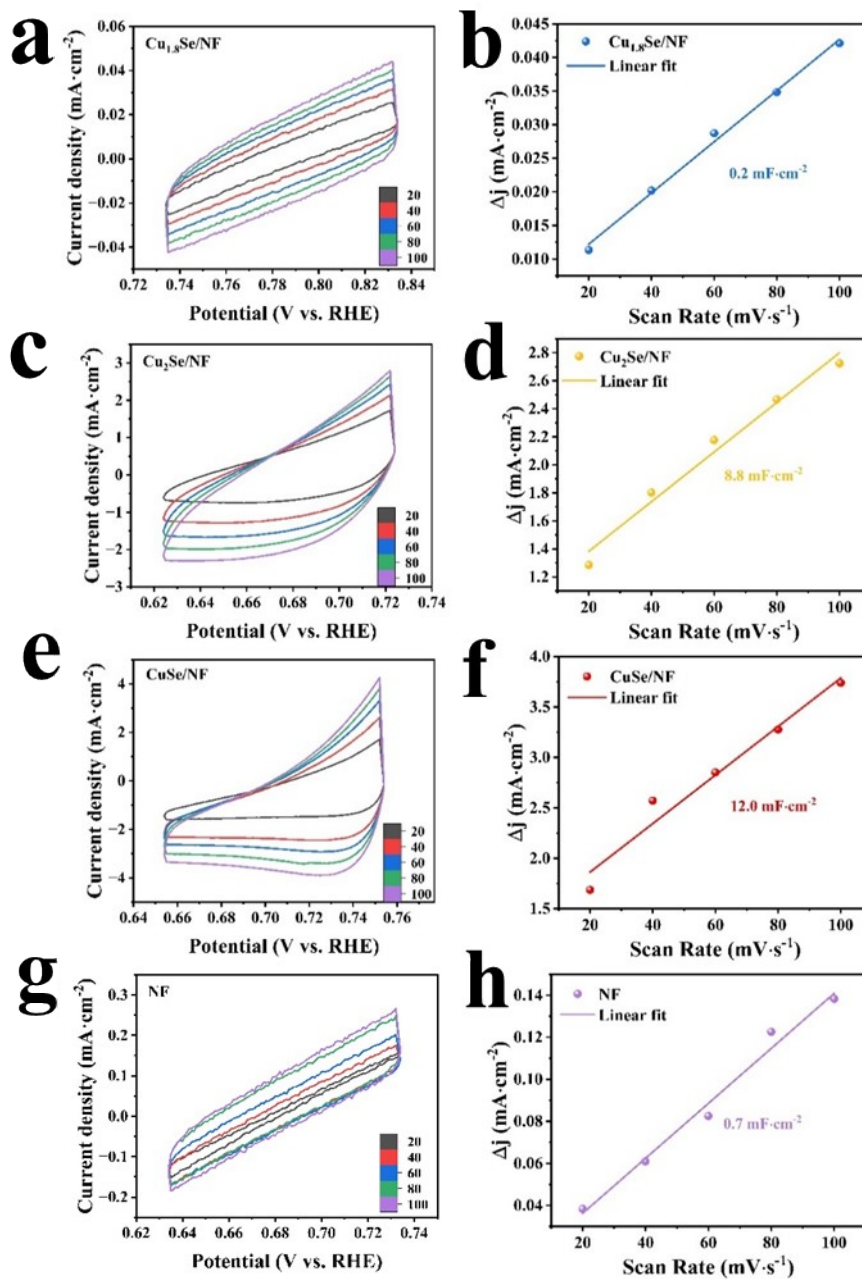

**Fig. S2** Cyclic voltammograms at scan rates from 20-100  $\text{mV}\cdot\text{s}^{-1}$ . Samples measured in a non-Faradaic region at different scan rates in 1 M KOH + 0.5 M urea electrolyte: (a, b)  $\text{Cu}_{1.8}\text{Se}/\text{NF}$ , (c, d)  $\text{Cu}_2\text{Se}/\text{NF}$ , (e, f)  $\text{CuSe}/\text{NF}$  and (g, h)  $\text{NF}$ .

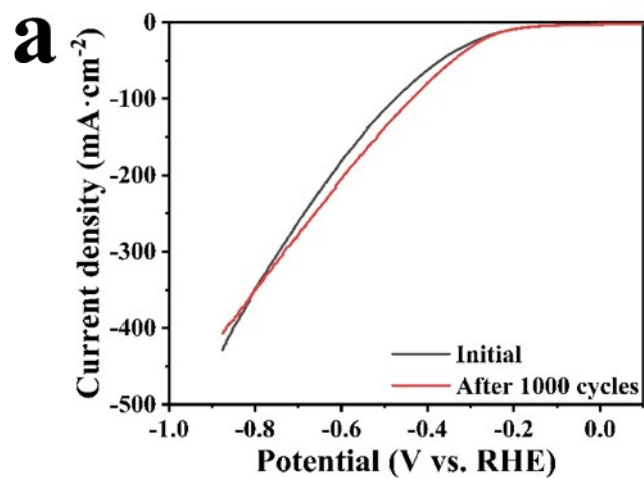

**Fig. S3** (a) Polarization curves of CuSe/NF for the HER before and after 1000 CV cycles in 1 M KOH + 0.5 M urea.

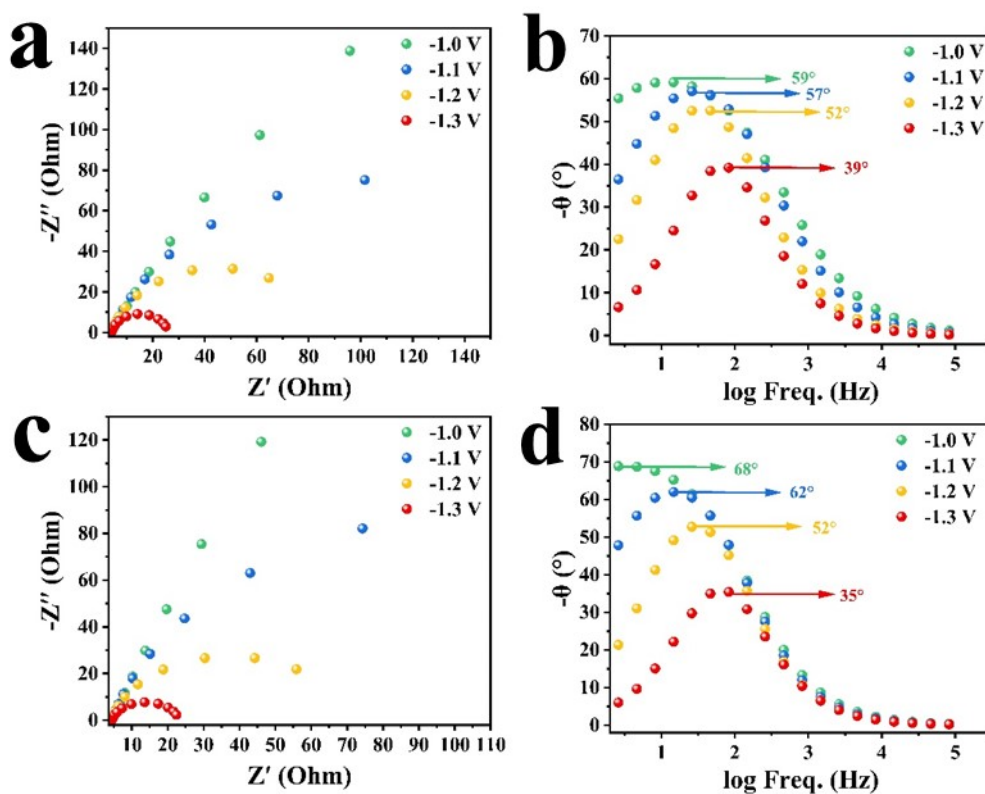

**Fig. S4** Nyquist and Bode plots at different potentials (-1.0, -1.1, -1.2, and -1.3 V vs. SCE) for (a, b)  $\text{Cu}_{1.8}\text{Se}/\text{NF}$  and (c, d)  $\text{Cu}_2\text{Se}/\text{NF}$  in 1 M KOH + 0.5 M urea electrolyte.

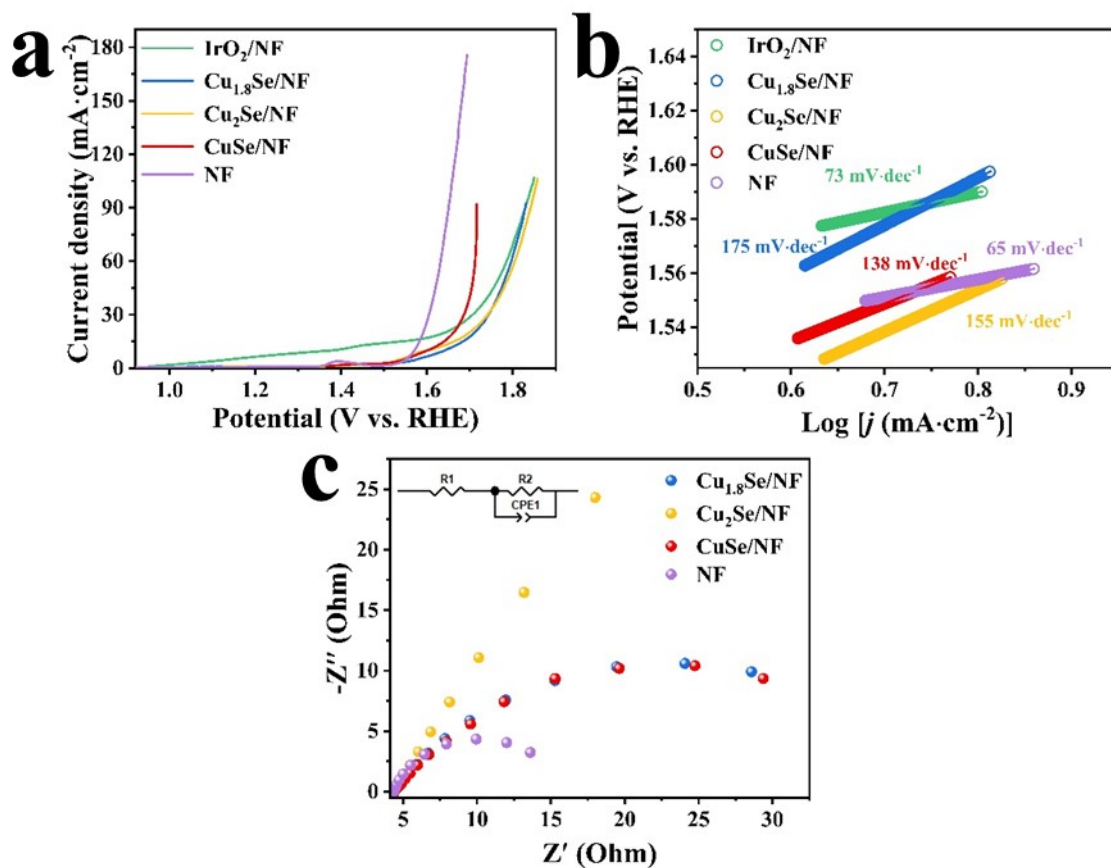

**Fig. S5** (a) LSV curves towards the OER of Pt/C/NF, Cu<sub>1.8</sub>Se/NF, Cu<sub>2</sub>Se /NF, CuSe/NF and NF in 1.0 M KOH; (b) Tafel slopes towards the OER in 1.0 M KOH; (c) EIS results at 10 mA·cm<sup>-2</sup> towards the OER in 1.0 M KOH.

**Table S2** Comparison of UOR properties of CuSe/NF with other catalysts.

| Catalyst                                                          | j (mA cm <sup>-2</sup> ) | η (V) | Ref.      |
|-------------------------------------------------------------------|--------------------------|-------|-----------|
| CuSe/NF                                                           | 10                       | 1.38  | This work |
| NiCo <sub>2</sub> S <sub>4</sub> @Ni <sub>3</sub> Se <sub>2</sub> | 10                       | 1.396 | 6         |
| Cu <sub>3</sub> P@CuO <sub>x</sub>                                | 10                       | 1.37  | 7         |
| Se-CoS <sub>2</sub> NW/CF                                         | 10                       | 1.46  | 8         |
| NiMoSe                                                            | 10                       | 1.39  | 9         |
| Cu <sub>3</sub> P-NW/CF                                           | 10                       | 1.43  | 10        |

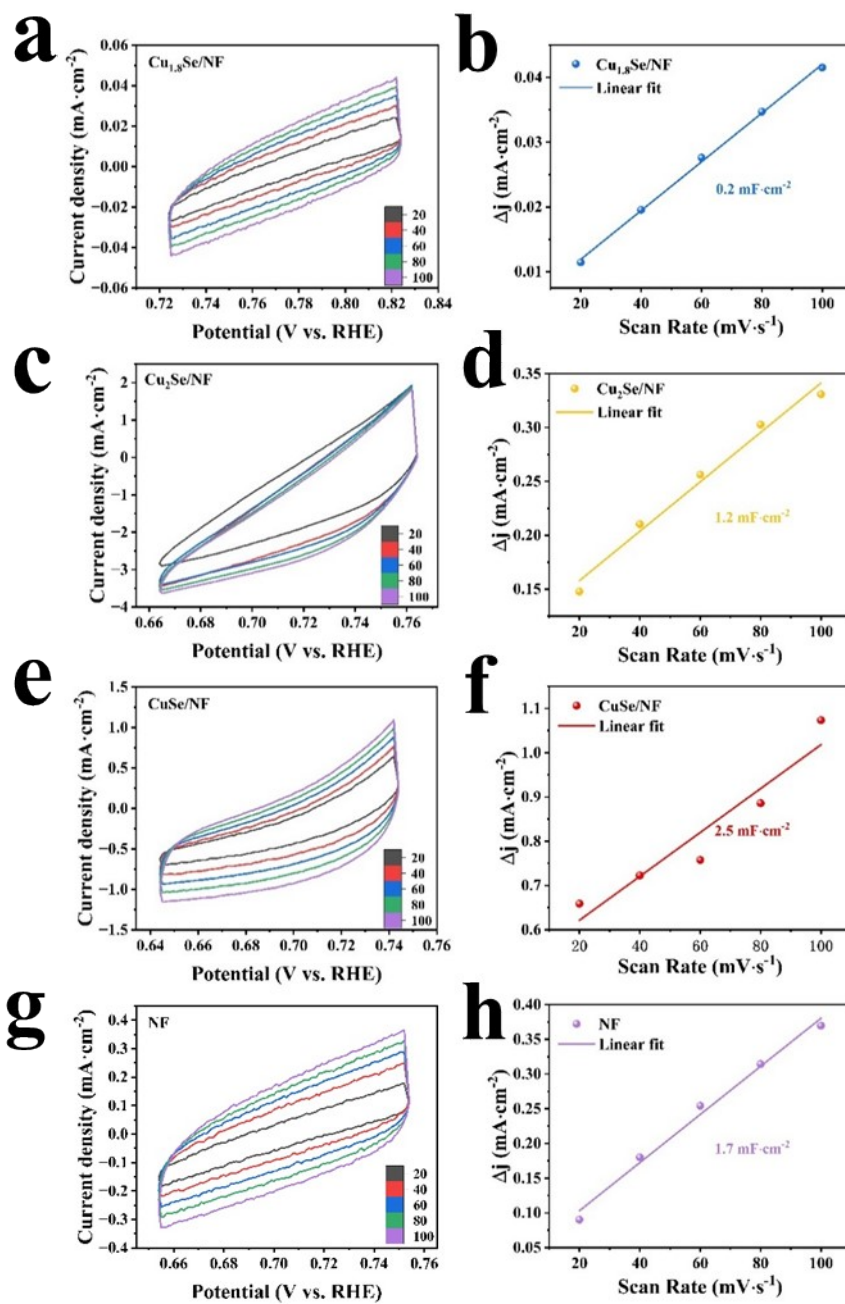

**Fig. S6** Cyclic voltammograms at scan rates from 20-100  $\text{mV}\cdot\text{s}^{-1}$ . Samples measured in a non-Faradaic region at different scan rates in 1 M KOH + 0.5 M urea electrolyte: (a, b)  $\text{Cu}_{1.8}\text{Se}/\text{NF}$ , (c, d),  $\text{Cu}_2\text{Se}/\text{NF}$  (e, f),  $\text{CuSe}/\text{NF}$  and (g, h)  $\text{NF}$ .

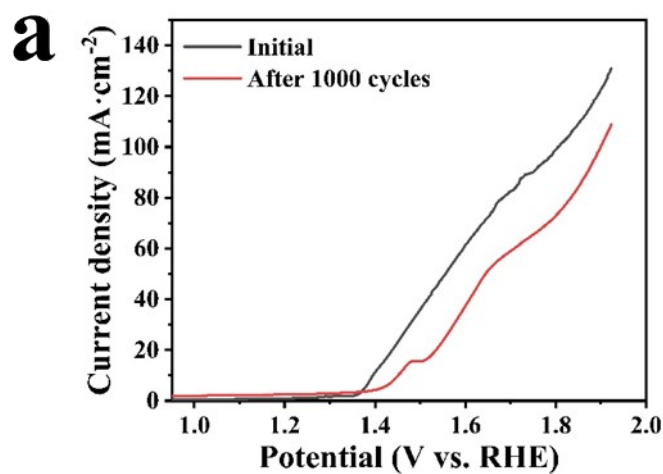

Fig. S7. (a) Polarization curves of CuSe/NF for the UOR before and after 1000 CV cycles.

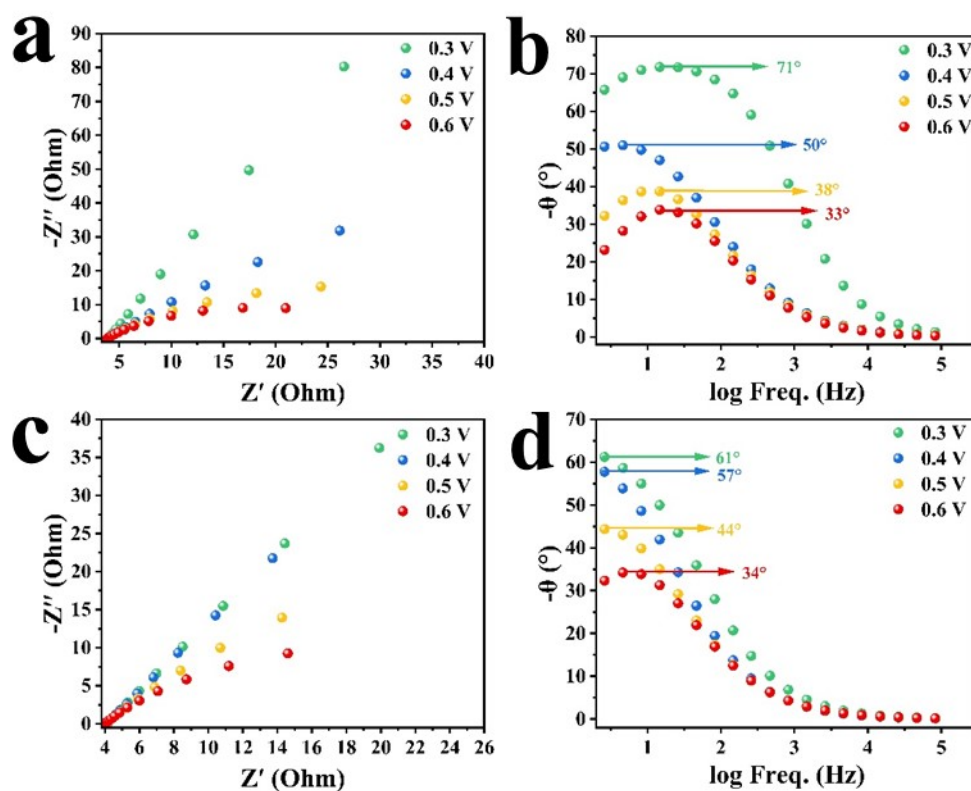

Fig. S8 Nyquist and Bode plots at different potentials (0.3, 0.4, 0.5, and 0.6V vs. SCE) for (a, b)  $\text{Cu}_{1.8}\text{Se}/\text{NF}$  and (c, d)  $\text{Cu}_2\text{Se}/\text{NF}$  in 1 M KOH + 0.5 M urea electrolyte.

## Reference

1. J. Qian, T. Wang, B. Xia, P. Xi and D. Gao, *Electrochimica Acta*, 2019, **296**, 701-708.



2. H. Qi, P. Zhang, H. Wang, Y. Cui, X. Liu, X. She, Y. Wen and T. Zhan, *J Colloid Interface Sci*, 2021, **599**, 370-380.
3. C. An, Y. Wang, R. Huang, Y. Li, C. Wang, S. Wu, L. Gao, C. Zhu, Q. Deng and N. Hu, *Colloids and Surfaces A: Physicochemical and Engineering Aspects*, 2023, **667**, 131360.
4. M. Wei, D. Zhang, J. Deng, X. Xiao, L. Wang, X. Wang, M. Song, S. Wang, X. Zheng and X. Liu, *Industrial & Engineering Chemistry Research*, 2022.
5. F.-b. Guo, X.-y. Zhao, H.-y. Lei, Y. Xu, K.-k. Liu, L.-x. Zhang, J.-m. Xue and H.-r. Sun, *Journal of Alloys and Compounds*, 2022, **924**, 166538.
6. K. Cui, J. Fan, Z. Wang, G. Xiao, S. Gao, T. Huang, Z. Tan, C. Niu, W. Luo and Z. Chao, *Journal of Electroanalytical Chemistry*, 2023, **944**, 117681.
7. H. A. Bandal and H. Kim, *Applied Surface Science*, 2023, **622**, 156925.
8. Y. Tan, Y. Yin, X. Yin, C. Lan, Y. Wang, F. Hu, Q. Huang and Y. Mi, *Catalysts*, 2021, **11**, 169.
9. H. Wang, X. Jiao, W. Zeng, Y. Zhang and Y. Jiao, *International Journal of Hydrogen Energy*, 2021, **46**, 37792-37801.
10. H. Shen, T. Wei, J. Ding and X. Liu, *Materials (Basel)*, 2023, **16**, 4169.
